# Supplementary material
Source: PubMed Central journal article supplement (PMC3895351)
Supplement: bcp0077-0102-SD1.pdf [file bcp0077-0102-SD1.pdf]

**Appendix 1** Subject headings used to locate articles

| <b>Electronic databases</b>                           | <b>Subject headings</b>                                                                                                                                                                                                                                                                                                                                                                                                                                                                                                                                                                                                                                                                                                                                                                                                                                                                                                                                                                                                                                                                                                                                                               |
|-------------------------------------------------------|---------------------------------------------------------------------------------------------------------------------------------------------------------------------------------------------------------------------------------------------------------------------------------------------------------------------------------------------------------------------------------------------------------------------------------------------------------------------------------------------------------------------------------------------------------------------------------------------------------------------------------------------------------------------------------------------------------------------------------------------------------------------------------------------------------------------------------------------------------------------------------------------------------------------------------------------------------------------------------------------------------------------------------------------------------------------------------------------------------------------------------------------------------------------------------------|
| Medline                                               | Community Pharmacy Services (fixed subject heading), Medication Therapy Management, patient compliance, quality of health care, treatment outcome, delivery of health care (integrated), continuity of patient care, cost-benefit analysis, costs and cost analysis, drug costs, drug interactions, drug monitoring, drug prescriptions, drug therapy, health care costs, health services research, home care services, hospitalization, insurance (pharmaceutical care), Medicaid, Medicare part D, medication adherence, outcome assessment (health care), patient care, patient care planning, patient education as topic, pharmaceutical services, pharmacies, pharmacists, polypharmacy, primary health care, professional role, professional-patient relations, program evaluation, interprofessional relations, prescription drugs, drug utilization review, health care reform, ambulatory care, fees (pharmaceutical), disease management, patient care team, direct service costs, medication errors, counselling, cost savings, National Health Programs, professional practice, fees and charges, for-for-service plans, mortality, pharmacy, economics (pharmaceutical). |
| Embase                                                | Pharmacy(fixed subject heading), Medication Therapy Management, health care quality, patient compliance, treatment outcome, health care delivery, Medicaid, Medicare, outcome assessment, patient counselling, reimbursement, pharmaceutical care, pharmacist, ambulatory care, patient care, patient education, drug utilization, health care cost, home care, community care, primary medical care, professional practice, clinical pharmacy, economic evaluation, polypharmacy, medication error, hospitalization, integrated health care system, cost effectiveness analysis, cost benefit analysis, medical fee, health care organization, drug monitoring, prescription drug, drug interaction, fee, drug program, education program, National Health Service, utilization review.                                                                                                                                                                                                                                                                                                                                                                                              |
| International<br>Pharmaceutical<br>Abstracts<br>(IPA) | Pharmacy community (fixed subject heading), pharmacy, interventions, compliance, quality assurance, professionalism, pharmacy services, pharmacist, patient care, pharmaceutical care, ambulatory care, managed care systems, disease management, primary care, education pharmaceutical, outcomes, reimbursement, drug utilization, health benefit program, errors medication, drug interaction, clinical pharmacy, consultant pharmacist, patient education, professional advancement, costs, pharmacists community, economics, clinical pharmacists, health care, fees, centres for Medicare and Medicaid services, professional fees, drug information.                                                                                                                                                                                                                                                                                                                                                                                                                                                                                                                           |

Medline and Embase: all subject headings were exploded, IPA: all subject headings were searched with .sh.
